1 **TITLE: EXPLORING THE OVERLAP BETWEEN RHEUMATOID ARTHRITIS**

2 **SUSCEPTIBILITY LOCI AND LONG NON-CODING RNA ANNOTATIONS**

3 **RUNNING TITLE: RHEUMATOID ARTHRITIS RISK LOCI AND LONG NON-CODING RNA**

4 James Ding<sup>1</sup> (james.ding@manchester.ac.uk), Chenfu Shi<sup>1</sup>, John Bowes<sup>1,2</sup>, Stephen  
5 Eyre<sup>1,2</sup>, Gisela Orozco<sup>1,2</sup>

6 <sup>1</sup>Centre for Genetics and Genomics Versus Arthritis. Division of Musculoskeletal and  
7 Dermatological Sciences, School of Biological Sciences, Faculty of Biology, Medicine  
8 and Health, The University of Manchester, UK.

9 <sup>2</sup>NHR Manchester Biomedical Research Centre, Manchester University NHS  
10 Foundation Trust, Manchester Academic Health Science Centre, Manchester, M13  
11 9WL, UK.

12

13 **ABSTRACT**

14 Whilst susceptibility variants for many complex diseases, such as rheumatoid arthritis  
15 (RA), have been well characterised, the mechanism by which risk is mediated is still  
16 unclear for many loci. This is especially true for the majority of variants that do not  
17 affect protein-coding regions. lncRNA represent a group of molecules that have been  
18 shown to be enriched amongst variants associated with RA and other complex  
19 diseases, compared to random variants. In order to establish to what degree direct  
20 disruption of lncRNA may represent a potential mechanism for mediating RA  
21 susceptibility, we chose to further explore this overlap. By testing the ability of  
22 annotated features to improve a model of disease susceptibility, we were able to  
23 demonstrate a local enrichment of enhancers from immune-relevant cell types  
24 amongst RA susceptibility variants ( $\log_2$  enrichment 3.40). This was not possible for  
25 lncRNA annotations in general, however a small, but significant enrichment was  
26 observed for immune-enriched lncRNA ( $\log_2$  enrichment 0.867002). This enrichment  
27 was no longer apparent when the model was conditioned on immune-relevant  
28 enhancers ( $\log_2$  enrichment -0.372734), suggesting that direct disruption of lncRNA  
29 sequence, independent of enhancer disruption, does not represent a major  
30 mechanism by which susceptibility to complex diseases is mediated. Furthermore, we  
31 demonstrated that, in keeping with general lncRNA characteristics, immune-enriched  
32 lncRNA are expressed at low levels that may not be amenable to functional  
33 characterisation.

## 34 INTRODUCTION

35 In keeping with other complex diseases, rheumatoid arthritis (RA) susceptibility loci are  
36 mainly non-coding, with relatively few variants having a potential impact upon the  
37 coding sequence for a protein [1,2]. Enhancers have been identified as likely to  
38 mediate disease susceptibility at many loci. Evidence to support this generalization  
39 includes demonstrated effects of genome wide association study (GWAS) variants on  
40 enhancers at individual loci [3], as well as an enrichment of RA GWAS variants amongst  
41 enhancers from relevant cell types [4]. Alternative non-coding elements, such as long  
42 non-coding RNA (lncRNA) may also play a role in mediating the increased risk  
43 associated with non-coding variants.

44 lncRNA are a heterogeneous class of molecules that are defined based on a lack of  
45 protein-coding potential and a minimum transcribed length of 200 nucleotides. Whilst  
46 discrete subcategories exist, such as long intergenic non-coding RNAs, promoter  
47 associated-lncRNAs or antisense lncRNA with some discriminatory characteristics,  
48 including genomic context, overlapping chromatin marks, length and structure [5], it  
49 can still be difficult to discriminate a genuine lncRNA annotation from a product of  
50 spurious transcription. Many individual lncRNA have been functionally characterised,  
51 with gene regulation featuring frequently amongst the wide variety of roles described.  
52 One important subcategory was identified following observations of RNA polymerase II  
53 recruitment and transcription at enhancers [6]. Often described as enhancer derived  
54 RNA (eRNA), expression of these transcripts is highly correlated with enhancer activity

55 [7] and increasing evidence suggests that these ncRNA may contribute towards  
56 enhancer function, although the precise mechanism is still unclear [8].

57 There is some evidence to suggest that GWAS susceptibility variants are enriched  
58 amongst lncRNA [9,10]. However, using conventional methods of determining whether  
59 annotations overlap more than can be expected by chance it is difficult to  
60 appropriately account for confounding factors, such as chromosomal compartments or  
61 chromatin accessibility. Using the *ab initio* MiTranscriptome assembly (58,648  
62 lncRNA), which was generated using a large collection of RNA sequencing libraries,  
63 GWAS SNPs were demonstrated to be enriched in lncRNA, compared to other SNPs  
64 tested for in GWAS analyses [9]. This enrichment was also observed using either GWAS  
65 SNPs or probabilistically identified causal SNPs (PICS) and lncRNA from the functional  
66 annotation of the human genome (FANTOM) cap-analysis gene expression (CAGE)  
67 associated transcriptome (CAT) assembly (27,919 lncRNA), generated using CAGE  
68 datasets in combination with existing assemblies [10]. Using the tissue specific nature  
69 of the FANTOM CAT annotation it was also possible to demonstrate that this  
70 enrichment was markedly higher when testing specifically for an enrichment of  
71 immune-relevant GWAS PICS in immune-expressed lncRNA transcripts.

72 Despite these studies, the relevance of lncRNA to the study of individual complex  
73 diseases, such as RA, remains unclear. This is especially true given the overlap in  
74 genomic locality and function between enhancers and lncRNA. We chose to investigate  
75 the overlap between lncRNA annotations, enhancer annotations and GWAS SNPs  
76 associated with RA susceptibility, with the aim of establishing to what degree the

77 direct disruption of lncRNA by RA-associated variants may contribute to the mediation  
78 of disease risk. Central to our investigation is the use of the fgwas algorithm [11],  
79 which tests the ability of individual annotations to improve a probabilistic model of  
80 disease susceptibility, constructed using GWAS summary statistics. Using this method a  
81 local enrichment is estimated, that takes into consideration the non-random  
82 distribution of potentially confounding genomic features. In addition, it is possible to  
83 model multiple traits and establish the degree to which they are independently  
84 predictive.

## 85 **MATERIALS AND METHODS**

### 86 **ENRICHMENT TESTING**

87 Enrichment testing was performed using RA summary statistics [1] and fgwas v0.3.6  
88 [11], with the “-cond” option called for conditional analyses. Chromatin state data was  
89 obtained from the Roadmap Epigenomics project [12], with the expanded, 18-state  
90 model used for all 98 corresponding epigenomes. The 18-states were combined to  
91 form four exclusive annotations as follows: TSSs: Active TSS (1), Flanking TSS (2),  
92 Flanking TSS upstream (3), Flanking TSS downstream (4), Bivalent/poised TSS (14).  
93 Transcription: Strong transcription (5), Weak Transcription (6). Enhancers: Genic  
94 enhancer 1 (7), Genic enhancer 2 (8), Active enhancer 1 (9), Active enhancer 2 (10),  
95 Weak enhancer (11), Bivalent enhancer (15). Repressed chromatin: ZNF genes and  
96 repeats (12), Heterochromatin (13), Repressed polycomb (16), Weak repressed  
97 polycomb (17), Quiescent/low (18). The following lncRNA datasets were interrogated:  
98 Lncipedia v5.2 [13], miTranscriptome v2 [9] and FANTOM CAT (robust) [10]. Immune-

99 relevant enhancers were defined as genomic regions annotated as enhancers in cell-  
100 types defined as originating from “Blood and T cell” or “HSC and B cell” by the  
101 Roadmap Epigenomics project. The definition of Immune-enriched lncRNA is based on  
102 the underlying sample ontology and was wholly adopted from Hon et al. requiring:  
103 detection in at least 50% of immune-relevant samples, 5 x higher expression in  
104 immune-relevant samples than in other samples and  $P < 0.05$  in a one-tailed Mann-  
105 Whitney rank sum test [10].

#### 106 **EXPRESSION PROFILING**

107 Raw RNA-seq reads were downloaded from the Roadmap Epigenomics project for  
108 primary T-helper cells (SRA accession SRR644513 and SRR643766) [12]. Reads were  
109 then filtered for quality, adapter content and polyA tails using fastp version 19.7, with  
110 default settings and polyX tail trimming enabled. Transcripts were quantified using  
111 Salmon version 13.1 [14] using suggested settings (“quant” mode and “-  
112 validatemappings”) and using the reference index generated from the FANTOM CAT  
113 robust database [10]. Transcripts quantifications (reported as Transcripts per million,  
114 TPM) were then remapped to genes and summed for each gene. CAGE transcript  
115 counts per million (CPM) were taken from FANTOM CAT for T-helper cells  
116 (CL\_0000084\_T\_cell), as published [10].

117 Statistical difference between the distributions of immune-enriched lncRNA and mRNA  
118 abundance was established using a two-sided Welch’s t-test, with no assumption of  
119 equal variance. This test assumes a normal distribution of the mean. Using the Mann-

120 Whitney u-test, which does not require this assumption, it was not possible to  
121 estimate a p-value as it is too close to zero.

## 122 **RESULTS**

### 123 **ENHANCER ANNOTATIONS FROM IMMUNE-RELEVANT CELL TYPES ARE ENRICHED AMONGST RA**

#### 124 **SUSCEPTIBILITY VARIANTS**

125 An enrichment of RA PICS has previously been demonstrated amongst *cis*-regulatory  
126 elements that are active in T-helper cells and lymphoblastoid cells [4], using data from  
127 the high density ImmunoChip custom SNP array. In order to establish confidence in the  
128 ability of fgwas to identify similar enrichments we sought to validate this evidence of  
129 enrichment using a more inclusive approach that incorporates the probability of  
130 association for all SNPs tested in the most recent RA GWAS meta-analysis [1]. In order  
131 to achieve this, chromatin state data taken from the Roadmap Epigenomics project  
132 [12] was incorporated in a model of RA susceptibility. Using enrichment estimates  
133 generated using the expanded 18-state model, it is possible to discern an enrichment  
134 of certain chromatin states, such as genic enhancers, active enhancers and weak  
135 enhancers in immune-relevant cell types, such as B cells, T cells and monocytes (panel  
136 A in S1 Fig), however the confidence intervals (CIs) for estimates are broad for many  
137 states, likely due to a reduced abundance of these annotations (panel B and C in S1  
138 Fig). The size of CIs was improved by combining states to generate four more easily  
139 interpretable annotations (enhancers, transcription start sites (TSSs), transcription,  
140 and repressed chromatin; Fig 1). In keeping with our understanding of RA, the highest  
141 level of enrichment was observed for enhancer annotations in immune-relevant cell

142 types, with regulatory T cells showing the highest enrichment ( $\log_2$  enrichment 3.17,  
143 95% CI 2.58; 3.75015). In immune-relevant cell types TSSs were also enriched, whilst  
144 repressed chromatin was depleted (Fig 1).

#### 145 **LNCRNA ANNOTATIONS SHOW NEGLIGIBLE ENRICHMENT AMONGST RA SUSCEPTIBILITY VARIANTS**

146 We applied fgwas to test for an enrichment of lncRNA amongst RA susceptibility  
147 variants, using Incipedia, a large lncRNA database curated from a number of sources  
148 [13], the MiTranscriptome assembly [9], and the FANTOM CAT assembly [10]. Using  
149 fgwas, MiTranscriptome lncRNA genes show a level of depletion amongst RA  
150 susceptibility variants comparable to repressed chromatin. MiTranscriptome lncRNA  
151 exons and both genes and exons from either FANTOM CAT or Incipedia all show  
152 negligible enrichment (Fig 2A).

#### 153 **LNCRNA ANNOTATIONS WITH ENRICHED EXPRESSION IN IMMUNE-RELEVANT CELLS ARE SUBTLY** 154 **ENRICHED AMONGST RA SUSCEPTIBILITY VARIANTS**

155 Uniquely, FANTOM CAT transcripts are associated with tissue specific expression data.  
156 As in the original FANTOM CAT publication, we took advantage of this additional  
157 information, to test for an enrichment of lncRNA whose expression is enriched in  
158 immune-relevant cell types amongst RA susceptibility loci. This approach  
159 demonstrated a subtle enrichment of lncRNA genes ( $\log_2$  enrichment 0.867, 95% CI  
160 0.0554; 1.57) and similar level of enrichment for their exons, albeit with an increased  
161 confidence interval ( $\log_2$  enrichment 0.799, 95% CI 2.30; 1.94). FANTOM CAT mRNA  
162 annotations, whose expression is enriched in immune-relevant cell types, were  
163 included in order to provide a comparison. Genic mRNA annotations showed a similar



164 level of enrichment as lncRNA genes, with mRNA exons exhibiting slightly higher  
165 enrichment (Fig 2B).

166 **THE SUBTLE ENRICHMENT OF IMMUNE-ENRICHED LNCRNA OBSERVED IS NOT INDEPENDENT OF**  
167 **IMMUNE-RELEVANT ENHANCER ANNOTATIONS**

168 Given the strong enrichment of immune-relevant enhancers amongst RA susceptibility  
169 loci and the established overlap between lncRNA annotations and enhancers, we were  
170 interested to investigate the independence of these variables using fgwas. In this  
171 conditional analysis, a residual enrichment of immune-enriched FANTOM CAT  
172 annotations was tested after the enrichment of immune-relevant enhancers ( $\log_2$   
173 enrichment 3.40, 95% CI 2.54; 4.58) was accounted for (Fig 3Fig 3). Interestingly, both  
174 lncRNA and mRNA annotations no longer show significant enrichment, indicating that  
175 once enrichment of susceptibility variants in enhancers has been accounted for no  
176 remaining enrichment of mRNA or lncRNA is apparent.

177 **IMMUNE-ENRICHED LNCRNA ARE EXPRESSED AT LOW LEVELS IN RA RELEVANT CELL TYPES**

178 lncRNA are generally considered to exhibit low expression levels and high tissue  
179 specificity that can make them difficult to study using conventional methods. Given  
180 their enrichment for RA susceptibility variants we were interested to establish whether  
181 this description applied to FANTOM CAT immune-enriched lncRNA in an RA relevant  
182 cell type. Using randomly primed Roadmap Epigenomics RNA-seq data from primary T-  
183 helper cells, the distribution of expression levels for FANTOM CAT immune-enriched  
184 lncRNA is significantly lower than that of FANTOM CAT immune-enriched mRNA ( $p =$   
185  $4.46 \times 10^{-34}$ , Fig 4A median lncRNA transcripts per million reads (TPM); 0.257, vs 124

186 for mRNA). The same is true using less-conventional expression profiling methods,  
187 such as those employed by FANTOM CAT, which offer improved sensitivity for the  
188 detection of transcripts of low abundance ( $p = 1.61 \times 10^{-24}$ , Fig 4B median lncRNA  
189 counts per million reads (CPM); 1.43, vs 71.7 for mRNA). 90% of immune-enriched  
190 lncRNA have abundance lower than 85.2% of immune-enriched mRNA in Roadmap  
191 Epigenomics RNA-seq data or 75.6% of immune-enriched mRNA in FANTOM CAT CAGE  
192 data.

### 193 **DISCUSSION**

194 By incorporating both cell-type specific enhancer and lncRNA annotations into a  
195 probabilistic model of RA susceptibility it is possible to demonstrate their respective  
196 levels of enrichment amongst RA susceptibility variants. Whilst previous studies have  
197 demonstrated an enrichment of lncRNA compared with randomly shuffled annotations  
198 these analyses fail to take into consideration the complex organisation of the genome  
199 and are easily confounded by alternative features. In our analysis, which incorporated  
200 lncRNA from various databases, it was only possible to demonstrate a subtle  
201 enrichment of lncRNA whose expression was previously identified as being enriched in  
202 relevant cell-types.

203 By conditioning a model of RA susceptibility on enhancer annotations from immune-  
204 relevant cell types it is possible to test the independence of additional features. This  
205 demonstrated that the subtle enrichment observed for immune-relevant lncRNA is  
206 entirely explained by immune-relevant enhancer annotations. Interestingly, the same  
207 is true of mRNA annotations, indicating that in both instances the primary influence of

208 susceptibility variants is in affecting non-coding regulatory elements, with any effect  
209 on mRNA and lncRNA being secondary and/or indirect. This suggests that the majority  
210 of genetic variance in disease susceptibility is mediated through disruption of  
211 regulatory elements and not through direct disruption of transcript sequences. This  
212 observation is in keeping with those made previously, relating to the minimal overlap  
213 between the coding sequence of mRNA and RA susceptibility variants. It is also  
214 consistent with the existence of well-characterised effects of RA susceptibility variants  
215 on coding regions, such as for the HLA proteins [15], which convey a significant, but  
216 not exhaustive proportion of risk.

217 Similarly, this analysis does not rule out the relevance of lncRNA at individual loci, in  
218 fact it is worth noting that there is evidence to suggest that C5T1lncRNA may mediate  
219 risk at a RA risk locus located at chromosomal position 9q33.2, with RA associated  
220 variants falling within a C5T1lncRNA exonic region [16]. Our analysis, however,  
221 precludes an effect of RA susceptibility variants on the transcribed sequence of lncRNA  
222 independent of enhancer disruption. Sequence-specific functions of lncRNA are,  
223 therefore, unlikely to mediate a significant proportion of the risk-modifying effect  
224 associated with RA susceptibility variants. Furthermore, the distribution of FANTOM-  
225 CAT immune-enriched lncRNA expression levels in primary T-helper cells highlight the  
226 difficulties associated with studying lncRNA, whose expression is typically very low and  
227 highly cell-type specific.

228 The analyses performed are specific to RA, however it is assumed that similar results  
229 would be reached using GWAS data, enhancer annotations and lncRNA annotations

230 relevant to other diseases. This would, therefore, suggest that the enrichment of  
231 lncRNA annotations amongst GWAS variants observed by others [9,10], may result  
232 from a high degree of overlap between regulatory features such as enhancers and  
233 lncRNA and other confounding features, such as active and inactive genomic  
234 compartments. As a generalisation, when it comes to functional characterization of  
235 variants associated with complex genetic disorders, sequence-specific lncRNA  
236 functions is unlikely to represent an attractive area for study; lncRNA are not  
237 independently enriched amongst such variants and are difficult to study, due to low  
238 expression levels. Despite these results, dysregulation of lncRNA expression could still  
239 play a role in RA and similar diseases, with disease associated variants affecting  
240 regulatory elements, such as enhancers that control lncRNA expression.

241 fgwas represents a useful tool for studying the enrichment of different features  
242 amongst susceptibility variants, especially when used in combination with Roadmap  
243 Epigenomics data in order to identify cell-types and tissues that are relevant for  
244 disease susceptibility. Whilst using this tool we observed that the number and size of  
245 annotations that are tested have a strong influence, both on the confidence with  
246 which any enrichment is estimated, as well as on the extent of that enrichment. It is  
247 likely that this may explain some of the subtle differences observed between different  
248 lncRNA databases.

249 Our analyses highlight the caveats associated with inferring functional relevance for a  
250 given feature, based purely on the observation of enrichment over a genomic  
251 background, as well as the care that must be taken when attempting to interpret such

252 enrichments. By deriving enhancer and lncRNA annotations from entirely different  
253 sources we have tried to ensure that the demonstrated dependence is not self-  
254 fulfilling, as it may have been if we defined immune-relevant lncRNA based on  
255 underlying chromatin states.

256 In conclusion, using fgwas and Roadmap Epigenomics chromatin state data it is  
257 possible to identify cell types and chromatin states of relevance to complex diseases,  
258 such as RA. In the case of RA this is predominantly enhancers and transcription start  
259 sites from immune-relevant cell types. It is also possible to test the association of  
260 alternative features and establish their independence from chromatin states. Here, a  
261 previously described enrichment of lncRNA amongst GWAS susceptibility loci was  
262 explored for RA. Immune-enriched lncRNA from the FANTOM-CAT database were  
263 found to be enriched amongst RA susceptibility loci, however, this enrichment was not  
264 apparent when chromatin-state data was taken into account.

265 Our results suggest that regulatory elements, such as enhancers, are likely to mediate  
266 the vast majority of variance in risk associated with RA and other complex diseases,  
267 with no substantial independent contribution being made by direct disruption of  
268 lncRNA sequences. Because of this, and the difficulties associated with detecting  
269 transcripts of such low abundance, sequence-specific lncRNA function does not  
270 represent the most attractive area for study with respect to RA susceptibility, except in  
271 the case of in depth characterisation of individual loci.

## 272 **ACKNOWLEDGEMENTS**

273 The authors would like to acknowledge the assistance given by IT Services and the use  
274 of the Computational Shared Facility at The University of Manchester.

## 275 REFERENCES

- 276 1. Okada Y, Wu D, Trynka G, Raj T, Terao C, Ikari K, et al. Genetics of rheumatoid  
277 arthritis contributes to biology and drug discovery. *Nature*. 2013;506: 376–381.  
278 doi:10.1038/nature12873
- 279 2. Eyre S, Bowes J, Diogo D, Lee A, Barton A, Martin P, et al. High-density genetic  
280 mapping identifies new susceptibility loci for rheumatoid arthritis. *Nat Genet*.  
281 2012;44: 1336–40. doi:10.1038/ng.2462
- 282 3. Simeonov DR, Gowen BG, Boontanrart M, Roth TL, Gagnon JD, Mumbach MR, et  
283 al. Discovery of stimulation-responsive immune enhancers with CRISPR  
284 activation. *Nature*. 2017;549: 111–115. doi:10.1038/nature23875
- 285 4. Farh KK-H, Marson A, Zhu J, Kleinewietfeld M, Housley WJ, Beik S, et al. Genetic  
286 and epigenetic fine mapping of causal autoimmune disease variants. *Nature*.  
287 2014;518: 337–43. doi:10.1038/nature13835
- 288 5. Jarroux J, Morillon A, Pinskaya M. History, discovery, and classification of  
289 lncRNAs. *Advances in Experimental Medicine and Biology*. Springer, Singapore;  
290 2017. pp. 1–46. doi:10.1007/978-981-10-5203-3\_1
- 291 6. Kim T-K, Hemberg M, Gray JM, Costa AM, Bear DM, Wu J, et al. Widespread  
292 transcription at neuronal activity-regulated enhancers. *Nature*. 2010;465: 182–  
293 7. doi:10.1038/nature09033

- 294 7. Andersson R, Gebhard C, Miguel-Escalada I, Hoof I, Bornholdt J, Boyd M, et al.  
295 An atlas of active enhancers across human cell types and tissues. *Nature*.  
296 2014;507: 455–61. doi:10.1038/nature12787
- 297 8. Lam MTY, Li W, Rosenfeld MG, Glass CK. Enhancer RNAs and regulated  
298 transcriptional programs. *Trends Biochem Sci*. 2014;39: 170–82.  
299 doi:10.1016/j.tibs.2014.02.007
- 300 9. Iyer MK, Niknafs YS, Malik R, Singhal U, Sahu A, Hosono Y, et al. The landscape of  
301 long noncoding RNAs in the human transcriptome. *Nat Genet*. 2015;47: 199–  
302 208. doi:10.1038/ng.3192
- 303 10. Hon C-C, Ramilowski JA, Harshbarger J, Bertin N, Rackham OJL, Gough J, et al. An  
304 atlas of human long non-coding RNAs with accurate 5' ends. *Nature*. 2017;543:  
305 199–204. doi:10.1038/nature21374
- 306 11. Pickrell JK. Joint analysis of functional genomic data and genome-wide  
307 association studies of 18 human traits. *Am J Hum Genet*. 2014;94: 559–73.  
308 doi:10.1016/j.ajhg.2014.03.004
- 309 12. Kundaje A, Meuleman W, Ernst J, Bilenky M, Yen A, Heravi-Moussavi A, et al.  
310 Integrative analysis of 111 reference human epigenomes. *Nature*. 2015;518:  
311 317–330. doi:10.1038/nature14248
- 312 13. Volders P-J, Anckaert J, Verheggen K, Nuytens J, Martens L, Mestdagh P, et al.  
313 LNCipedia 5: towards a reference set of human long non-coding RNAs. *Nucleic  
314 Acids Res*. 2019;47: D135–D139. doi:10.1093/nar/gky1031

- 315 14. Patro R, Duggal G, Love MI, Irizarry RA, Kingsford C. Salmon provides fast and  
316 bias-aware quantification of transcript expression. *Nat Methods*. 2017;14: 417–  
317 419. doi:10.1038/nmeth.4197
- 318 15. Raychaudhuri S, Sandor C, Stahl EA, Freudenberg J, Lee H-S, Jia X, et al. Five  
319 amino acids in three HLA proteins explain most of the association between MHC  
320 and seropositive rheumatoid arthritis. *Nat Genet*. 2012;44: 291–6.  
321 doi:10.1038/ng.1076
- 322 16. Messemaker TC, Frank-Bertoncelj M, Marques RB, Adriaans A, Bakker AM, Daha  
323 N, et al. A novel long non-coding RNA in the rheumatoid arthritis risk locus  
324 TRAF1-C5 influences C5 mRNA levels. *Genes Immun*. 2015;  
325 doi:10.1038/gene.2015.54
- 326



327 **FIGURE CAPTIONS**

328 **FIG 1. ENRICHMENT OF CHROMATIN STATE GROUPS AMONGST RA SUSCEPTIBILITY**

329 **VARIANTS FOR 98 CELL TYPES**

330 Estimates for enrichment of combined chromatin state groupings are illustrated for all  
331 98 cell types annotated within the Roadmap Epigenomics 18-state model. Cell-types  
332 are ordered and coloured according to the clustering established by the Roadmap  
333 Epigenomics project, with immune-relevant cell types coloured green. Estimates and  
334 confidence intervals are clipped at axis limits, where applicable.

335 **FIG 2. ENRICHMENT OF LNCRNA ANNOTATIONS AMONGST RA SUSCEPTIBILITY**

336 **VARIANTS**

337 Estimates for the enrichment of genic (black circle) and exonic (grey diamond)  
338 annotations from a variety of lncRNA containing databases, including 95% confidence  
339 intervals (A). Separate estimates are included for annotations identified as exhibiting  
340 enriched expression in immune-relevant cells (B).

341 **FIG 3. ENRICHMENT OF IMMUNE-ENRICHED LNCRNA AMONGST RA SUSCEPTIBILITY**

342 **VARIANTS AFTER CONDITIONING ON CHROMATIN STATE DATA**

343 The influence of immune-relevant enhancers (red circle) was fixed in a probabilistic  
344 model of RA susceptibility to determine whether the subtle enrichment of FANTOM  
345 CAT immune-enriched lncRNA or mRNA adds any additional predictive information and  
346 is therefore independently enriched. Genic (black circle) and exonic (grey diamond)  
347 annotations were both tested.

348 As may be expected given the magnitude of enrichments observed, after accounting  
349 for the effect of immune-enriched FANTOM CAT annotations, the residual enrichment  
350 of immune-relevant enhancers is not dramatically reduced (S2 Fig).

351 **FIG 4. DISTRIBUTION OF IMMUNE-ENRICHED LNCRNA AND MRNA EXPRESSION**  
352 **LEVELS IN PRIMARY T-HELPER CELLS**

353 Staggered bars are used to illustrate the proportion of transcripts whose expression  
354 falls in bins of 25 million transcripts, or counts, in Roadmap Epigenomics RNA-seq data  
355 (A) and FANTOM CAT CAGE data (B), respectively.

356 **SUPPORTING INFORMATION CAPTIONS**

357 **S1 FIG. OF CHROMATIN STATE ANNOTATIONS AMONGST RA SUSCEPTIBILITY**  
358 **VARIANTS**

359 Estimates for enrichment of individual states are illustrated for 98 cell types using the  
360 Roadmap Epigenomics 18-state model (a). Similar states were grouped into four  
361 groups for all immune-relevant primary cell-types (b), as individual states often gave  
362 very broad 95% confidence intervals (c). Cell-types are ordered according to the  
363 clustering established by the Roadmap Epigenomics project, with chromatin states  
364 reordered according to their subsequent grouping. Estimates and confidence intervals  
365 are clipped at axis limits, where applicable.

366 **S2 FIG. ENRICHMENT OF IMMUNE-RELEVANT ENHANCERS AMONGST RA**  
367 **SUSCEPTIBILITY VARIANTS AFTER CONDITIONING ON IMMUNE-ENRICHED**  
368 **TRANSCRIPTS**

369 The influence of FANTOM CAT immune-enriched lncRNA and mRNA was fixed in a  
370 probabilistic model of RA susceptibility to confirm the independent enrichment of  
371 immune-relevant enhancer chromatin states.

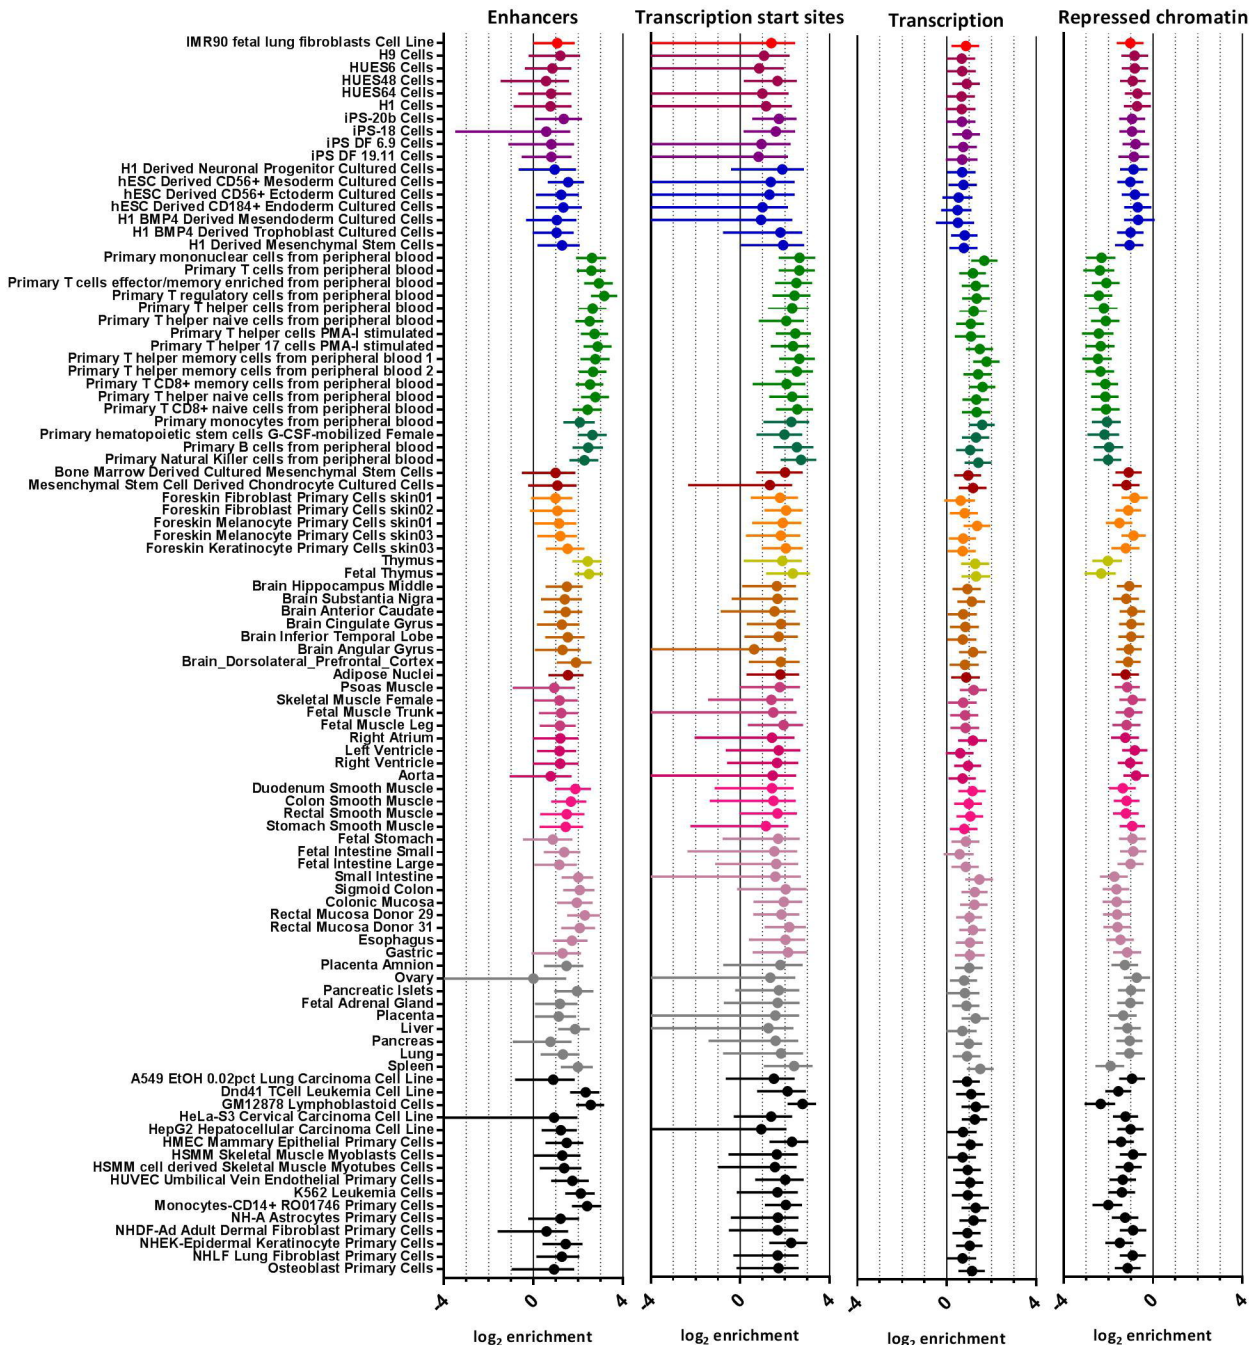

**a**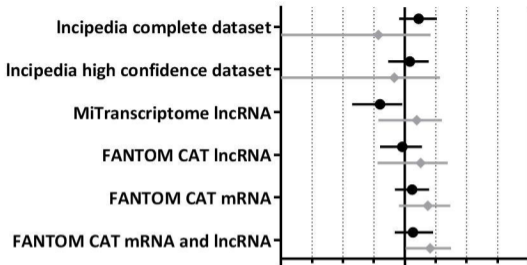**b**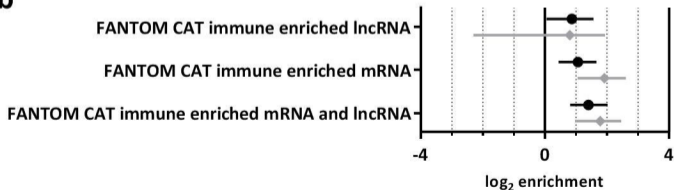

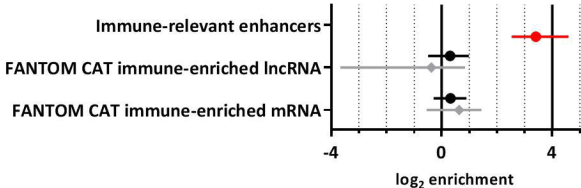

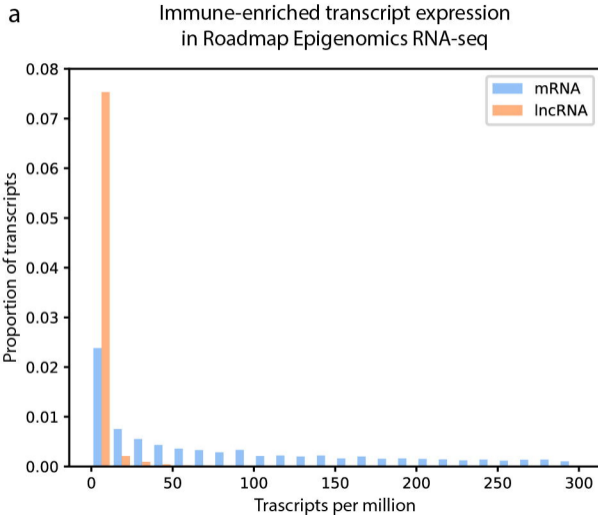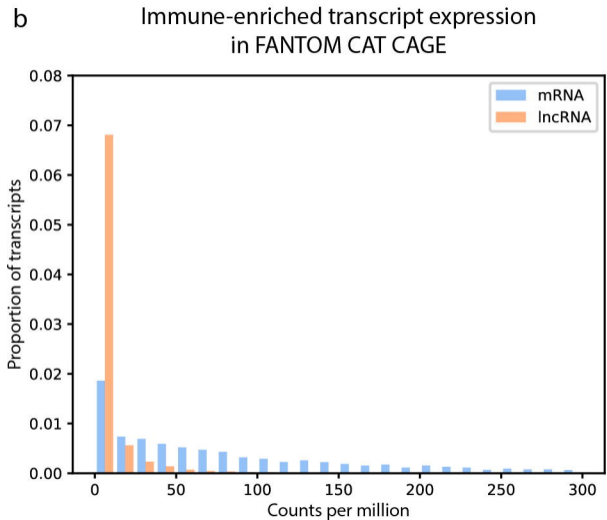

Source: http://biorxiv.org/content/10.1101/804880v1.full.pdf
